# Supplementary material for: Horizontal fissuring at the osteochondral interface: a novel and unique pathological feature in patients with obesity-related osteoarthritis
Source: PubMed Central journal article supplement — Ann Rheum Dis. 2020 Apr 8;79(6):811–8. doi: 10.1136/annrheumdis-2020-216942 (PMC7286031; doi:10.1136/annrheumdis-2020-216942), 2020-04-08
Supplement: annrheumdis-2020-216942supp001.pdf [file annrheumdis-2020-216942supp001.pdf]

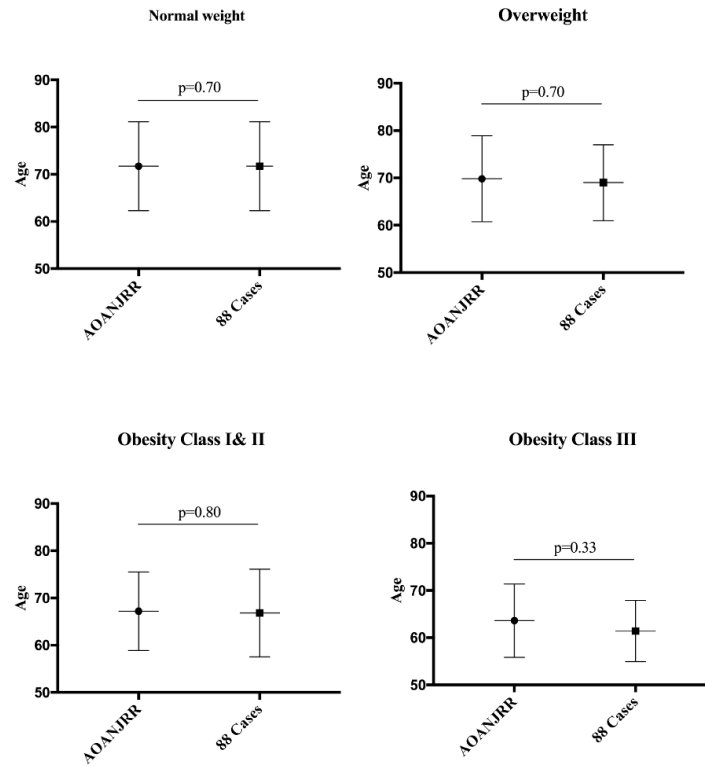

**Supplementary Figure 1.** No significant age differences in each category between the case series and the large cohort from AOANJRR.

Supplementary Table 1. BMI-associated change of microstructural parameters in SCB

| Compartment                  | Parameter                    | Unadjusted                       |                          | Age- and sex-adjusted            |                          |
|------------------------------|------------------------------|----------------------------------|--------------------------|----------------------------------|--------------------------|
|                              |                              | $\beta$ (95% CI)                 | P value                  | $\beta$ (95% CI)                 | P value                  |
| Predominant                  | BV/TV (%)                    | -0.343 (-0.668 to -0.018)        | <b>0.039</b>             | -0.469 (-0.821 to -0.118)        | <b>0.009</b>             |
|                              | Tb.Th ( $\mu\text{m}$ )      | -0.001 (-0.002 to 0.000)         | 0.117                    | -0.001 (-0.003 to 0.000)         | 0.117                    |
|                              | Tb.Sp ( $\mu\text{m}$ )      | 0.000 (-0.003 to 0.002)          | 0.901                    | 0.001 (-0.002 to 0.004)          | 0.669                    |
|                              | Tb.N (1/mm)                  | -0.001 (-0.012 to 0.011)         | 0.908                    | -0.005 (-0.017 to 0.007)         | 0.382                    |
|                              | SMI                          | 0.021 (-0.011 to 0.054)          | 0.189                    | 0.037 (0.004 to 0.069)           | <b>0.026</b>             |
|                              | DA                           | 0.000 (-0.007 to 0.006)          | 0.877                    | -0.001 (-0.008 to 0.006)         | 0.829                    |
|                              | Conn.Dn (1/mm <sup>3</sup> ) | 6.692E-7 (0.000 to 0.000)        | 0.381                    | 2.610E-7 (-1.388E-6 to 1.910E-6) | 0.754                    |
|                              | BMD (mg/cm <sup>3</sup> )    | -0.003 (-0.007 to 0.000)         | 0.083                    | -0.004 (-0.009 to 0.000)         | <b>0.041</b>             |
|                              | Medial                       | BV/TV (%)                        | -0.183 (-0.525 to 0.159) | 0.291                            | -0.343 (-0.711 to 0.024) |
| Tb.Th ( $\mu\text{m}$ )      |                              | -0.001 (-0.002 to 0.001)         | 0.412                    | -0.001 (-0.001 to 0.001)         | 0.227                    |
| Tb.Sp ( $\mu\text{m}$ )      |                              | -0.001 (-0.003 to 0.002)         | 0.714                    | 0.001 (-0.002 to 0.004)          | 0.655                    |
| Tb.N (1/mm)                  |                              | 0.003 (-0.008 to 0.015)          | 0.595                    | -0.002 (-0.014 to 0.011)         | 0.759                    |
| SMI                          |                              | 0.003 (-0.032 to 0.037)          | 0.885                    | 0.017 (-0.019 to 0.052)          | 0.359                    |
| DA                           |                              | -0.003 (-0.009 to 0.003)         | 0.377                    | -0.002 (-0.009 to 0.005)         | 0.601                    |
| Conn.Dn (1/mm <sup>3</sup> ) |                              | 1.184E-6 (-3.472E-2 to 2.716E-6) | 0.128                    | 7.990E-7 (-8.809E-7 to 2.479E-6) | 0.347                    |
| BMD (mg/cm <sup>3</sup> )    |                              | -0.002 (-0.006 to 0.002)         | 0.401                    | -0.003 (-0.008 to 0.001)         | 0.136                    |
| Lateral                      |                              | BV/TV (%)                        | -0.015 (-0.327 to 0.297) | 0.924                            | -0.131 (-0.473 to 0.210) |
|                              | Tb.Th ( $\mu\text{m}$ )      | -0.001 (-0.002 to 0.000)         | 0.123                    | -0.001 (-0.003 to 0.000)         | 0.099                    |
|                              | Tb.Sp ( $\mu\text{m}$ )      | -0.002 (-0.005 to -0.000)        | 0.100                    | -0.001 (-0.004 to 0.002)         | 0.379                    |
|                              | Tb.N (1/mm)                  | 0.008 (-0.002 to 0.017)          | 0.111                    | 0.003 (-0.008 to 0.013)          | 0.626                    |
|                              | SMI                          | -0.005 (-0.032 to 0.021)         | 0.696                    | 0.005 (-0.024 to 0.033)          | 0.736                    |
|                              | DA                           | -0.001 (-0.008 to 0.007)         | 0.862                    | -0.002 (-0.010 to 0.007)         | 0.702                    |
|                              | Conn.Dn (1/mm <sup>3</sup> ) | 6.366E-7 (-1.084E-7 to 1.382E-6) | 0.093                    | 6.023E-7 (-2.285E-7 to 1.433E-6) | 0.153                    |
|                              | BMD (mg/cm <sup>3</sup> )    | 0.000 (-0.004 to 0.003)          | 0.854                    | -0.002 (-0.006 to 0.002)         | 0.424                    |

Dependent variable: microstructural parameters (continuous variable). Independent variable: BMI (kg/m<sup>2</sup>, continuous variable); Method: Linear regression. BMI=body mass index; SCB=subchondral bone; BV/TV=bone volume by tissue volume; Tb.Th=trabecular thickness; Tb.Sp=trabecular separation; Tb.N=trabecular number; SMI=structure model index; DA=degree of anisotropy; Conn.Dn=connectivity density; Bone mineralized density (BMD, mg/cm<sup>3</sup>).
